# Supplementary material
Source: PubMed Central journal article supplement (PMC2877934)
Supplement: JCI39964sd.pdf [file JCI39964sd.pdf]

## Supplemental Methods

### Ligation-Mediated PCR and integration site analysis

DNA for detection of viral integration sites was isolated from murine splenocytes using DNeasy Blood, Tissue and Plant Kit (Qiagen, Valencia, CA) per manufacturer's instruction. Ligation-mediated PCR (LM-PCR) modified to streamline the procedure was used to determine viral integration sites. Briefly, 500 ng of DNA was digested 1 hour at 37 °C with 50 units of Mse1 (New England Biolabs, Ipswich, MA) in a 10 µl volume followed by heat inactivation at 65 °C for 20 minutes. Adapter primers were ligated on by the addition of 1.5 µl ligase buffer, 30 units T4 ligase (New England Biolabs, Ipswich, MA) and 1 µl each of 50 µM ALF3us 5'/5Phos/TAGTCCCTTAAGCGGAG/3AmM and ALF3ls 5'-GTAATACGACTCACATAGGGC (IDT, Coralville, IA) and the reaction was incubated for one hour at RT. PCR was carried out using a long terminal repeat (LTR) specific primer MSCV LTR1 5'-TCTCGCTTCTGTTGCGCGCTTC and an adaptor specific primer AFL3 5'-GTAATACGACTCACTATAGGGC. PCR conditions for a 50 µl reaction were 2 units Taq polymerase (Qiagen), 5 µl polymerase buffer and 1 µl each of ligation reaction, 10 mM dNTP, 10 µM primers. PCR Cycling conditions were 7 cycles of 94 °C for 30 sec and 72 °C for 4 minutes followed by 37 cycles of 94 °C for 30 sec, 63.7 °C for 30 sec and 72 °C for 3 minutes. Nested PCR used 1 µl of the first PCR product, the same reaction conditions were used as the first reaction, and nested primers were MSCV LTR 2 Nested 5'-CGTCGCCCCGGGTACCCGTATTC and AFL3 nested 5'-AGGGCTCCGCTTAAGGGAC. Nested cycling conditions: 5 cycles of 94 °C for 30 sec and 72 °C for 4 minutes followed by 30 cycles 94 °C for 30 sec, 63.7 °C for 30 sec and 72 °C for 3 minutes. 10µl of the nested PCR product were run on a 2% agarose gel. An internal control band from the 5'LTR 617 bp was seen. The nested PCR reaction was shotgun cloned without purification into the TOPO TA cloning kit (Invitrogen, Carlsbad,

CA) and transformed into One Shot E. coli (Invitrogen). Plasmid DNA was isolated using Miniprep Kit (Qiagen) and sequenced using primers M13F and M13R provided by TOPO TA cloning kit. A valid clone contains sequences of nested primers, LTR and/or mouse genomic DNA. The mouse genomic DNA sequence was blasted using NCBI's BLAST databases.

**Supplemental Table 1. MSCV-Myc integration sites in recipient mice**

| <b>Gene</b>   | <b>Location and distance</b> | <b>Mouse chromosome</b> | <b>Clones</b> |
|---------------|------------------------------|-------------------------|---------------|
| Prkcbp1       | 3' 46 kb                     | 2                       | 10            |
| 4632428N05Rik | 3' UTR                       | 10                      | 2             |
| STXBP4        | Intron 4                     | 11                      | 1             |
| Ankrd11       | 3' UTR                       | 8                       | 1             |
| LOC383692     | 5', 100 kb                   | 2                       | 1             |
| lpp           | Intron 1                     | 4                       | 1             |
| Tbkbp1        | 5' UTR                       | 11                      | 1             |
| Tel           | Intron 1                     | 11                      | 1             |
| Olf356/Olf357 | 5 kb                         | 2                       | 1             |
| Sema4b        | Intron 2                     | 7                       | 1             |
| Diap2         | 5' 8 KB                      | X                       | 1             |
| Emilin2       | Intron 4                     | 17                      | 1             |
| Spag9         | 5' 6.5 kb                    | 11                      | 1             |
| Lst1          | Intron 2                     | 17                      | 1             |
| Hpse          | 5', 8.5 kb                   | 5                       | 1             |
| LOC100038945  | 5', 500 kb                   | 11                      | 1             |
| Tcf7          | 5', 26 kb                    | 11                      | 1             |
| Trpa1         | Intron 8                     | 1                       | 1             |
| Actr3         | 5', 33 kb                    | 1                       | 1             |
| Hipk1         | 5', 5 kb                     | 3                       | 1             |
| Uvrag         | Intron 13                    | 7                       | 1             |
| EG434228      | 3', 7 kb                     | 7                       | 1             |
| Alg9          | 5', 1 kb                     | 9                       | 1             |
| Dhps          | 5', 2 kb                     | 8                       | 1             |

**Supplemental Table 2. MSCV-Myc integration sites in recipient mice**

| <b>Gene</b>   | <b>Location and distance</b> | <b>Mouse chromosome</b> | <b>Clones</b> |
|---------------|------------------------------|-------------------------|---------------|
| Prkcbp1       | 3' 46 KB                     | 2                       | 11            |
| Kctd1         | Exon 5                       | 18                      | 2             |
| Ttc13         | Intron 4                     | 8                       | 2             |
| LOC100039758  | 5', 38 KB                    | 9                       | 2             |
| LOC629750     | Intron 1                     | 11                      | 1             |
| Ctsd          | 5', 8 kb                     | 7                       | 1             |
| LOC668121     | 5', 41 KB                    | 5                       | 1             |
| St3gal2       | Intron 2                     | 8                       | 1             |
| Cbx1          | Intron 1                     | 11                      | 1             |
| Mgst2         | Intron 1                     | 3                       | 1             |
| Vps13d        | Intron 5                     | 4                       | 1             |
| 9130005N14Rik | Intron 6                     | 5                       | 1             |
| Ptpn3         | Intron 4                     | 4                       | 1             |
| Tcfec         | 5', 1 KB                     | 6                       | 1             |
| Zfp51         | Intron 1                     | 17                      | 1             |
| LOC100039681  | 5', 31 KB                    | 9                       | 1             |
| Ntn5          | 5', 4 KB                     | 7                       | 1             |
| Rbm12b        | 5', 4 KB                     | 4                       | 1             |
| Cux1          | Intron 2                     | 5                       | 1             |
| Lgmn          | 5' 13 KB                     | 12                      | 1             |
